# Supplementary material
Source: publisher site journal article supplement (https://static.cambridge.org/content/id/urn:cambridge.org:id:article:S1443964620000121/resource/name/S1443964620000121supp002.doc)
Supplement: Supplementary file 1 [file S1443964620000121supp002.doc]

| **Interview Guide** |
| --- |

**SERVICE AND SUPPORTS**

Predisposing and enabling access

1. Could you start by telling me what services and supports were put in place for you when you were discharged from the inpatient rehabilitation unit [spinal or brain injury unit]?
2. Have the range of services and supports that you access now changed much since you were discharged from inpatient rehabilitation?
3. Have you been able to (easily) access services/supports since being discharged?
4. Are any of your current services and supports (or will they be) funded under particular insurance schemes or compensation schemes? (e.g. NDIS, NIISQ, CTP)
5. Overall, how well do your current services and supports fit your needs?

**SERVICE AND SUPPORT ACCESSIBILITY**

Experiences of realising access (availability, accessibility, acceptability)

1. What aspects of your service access since discharge have been positive?
2. What has been challenging regarding your service access since discharge?
3. Have you ever ceased or avoided using a service or support?
4. Have you had reasonable continuity in terms of your service access since discharge?
5. How has your geographical location impacted your ability to access services and supports?
6. Overall, has your service access since discharge been convenient (e.g. continuity, availability, time)?

**SERVICE AND SUPPORT NEEDS**

Appropriateness and approachability

1. From your perspective, have the services and supports you have accessed since discharge always been appropriate to your needs? (e.g. type; frequency; intensity; timing, quality)
2. When have you thought your access to services/supports was not appropriate to your needs?
3. How would you identify and access any additional services and supports you may need in the future?
4. Overall, since your discharge, do you feel you have had opportunity to obtain all the services and supports you feel you need?
5. Are there any other comments that you want to add about your service access experiences since discharge from inpatient rehabilitation?

Thank you
